# Supplementary material for: Formation of various-axis-oriented wurtzite nuclei and enlargement of the a-axis-oriented region in AlFeN films deposited on Si(100) substrates
Source: Royal Society of Chemistry journal article supplement (doi:10.1039/d0ma01026j), 2021-01-01
Supplement: d0ma01026j1.pdf [file d0ma01026j1.pdf]

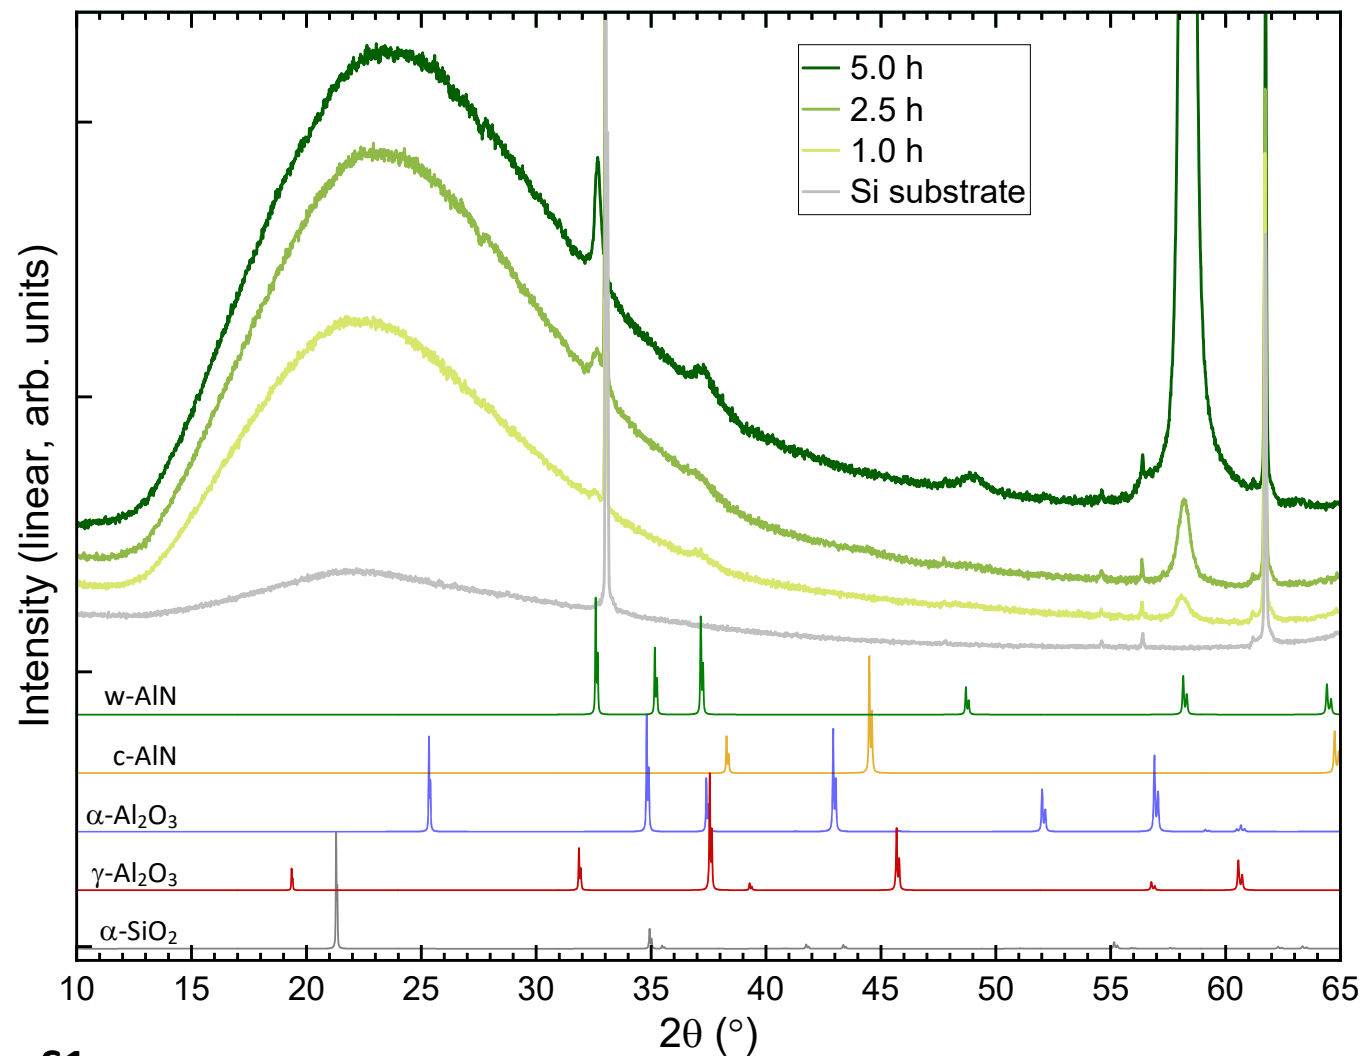

**Fig. S1**

P-XRD profiles of the samples and Si(100) substrate and simulated powder diffraction profiles of wurtzite AlN, rock-salt AlN(c-AlN),  $\alpha$ -Al<sub>2</sub>O<sub>3</sub>,  $\gamma$ -Al<sub>2</sub>O<sub>3</sub>, and  $\alpha$ -SiO<sub>2</sub>.
